# Supplementary material for: Low-Density Lipoproteins Increase Proliferation, Invasion, and Chemoresistance via an Exosome Autocrine Mechanism in MDA-MB-231 Chemoresistant Cells
Source: MDPI journal article supplement (doi:10.3390/biomedicines12040742), 2024-03-27

# Low-Density Lipoproteins Increase Proliferation, Invasion, and Chemoresistance via an Exosome Autocrine Mechanism in MDA-MB-231 Chemoresistant Cells

César Y. Castañeda-Sánchez<sup>1,2</sup>, Brenda Chimal-Vega<sup>1,2</sup>, Roberto León-Gutiérrez<sup>1,2</sup>, Adrián Ernesto Araiza-Robles<sup>1,2</sup>, Nicolás Serafín-Higuera<sup>3</sup>, Angel Pulido-Capiz<sup>1,2</sup>, Ignacio A. Rivero<sup>4</sup>, Raúl Díaz-Molina<sup>1,2</sup>, Manuel Alatorre-Meda<sup>5</sup>, Eustolia Rodríguez-Velázquez<sup>6,7</sup> and Victor García-González<sup>1,2,\*</sup>

<sup>1</sup> Departamento de Bioquímica, Facultad de Medicina Mexicali, Universidad Autónoma de Baja California, Mexicali 21000, Mexico; yahel.castaneda@uabc.edu.mx (C.Y.C.-S.); brenda.chimal@uabc.edu.mx (B.C.-V.); roberto.leon@uabc.edu.mx (R.L.-G.); adrian.araiza@uabc.edu.mx (A.E.A.-R.); pulido.angel@uabc.edu.mx (A.P.-C.); rauldiaz@uabc.edu.mx (R.D.-M.)

<sup>2</sup> Laboratorio Multidisciplinario de Estudios Metabólicos y Cáncer, Universidad Autónoma de Baja California, Mexicali 21000, Mexico

<sup>3</sup> Facultad de Odontología Mexicali, Universidad Autónoma de Baja California, Mexicali 21000, Mexico; nserafin@uabc.edu.mx

<sup>4</sup> Centro de Graduados e Investigación en Química, Tecnológico Nacional de México, Instituto Tecnológico de Tijuana, Tijuana 22510, Mexico; irivero@tectijuana.mx

<sup>5</sup> Centro de Graduados e Investigación en Química-Grupo de Biomateriales y Nanomedicina, CONAHCYT-Tecnológico Nacional de México, Instituto Tecnológico de Tijuana, Tijuana 22510, Mexico; manuel.alatorre@tectijuana.edu.mx

<sup>6</sup> Facultad de Odontología, Universidad Autónoma de Baja California, Tijuana 22390, Mexico; eustolia.rodriguez@uabc.edu.mx

<sup>7</sup> Centro de Graduados e Investigación en Química-Grupo de Biomateriales y Nanomedicina, Tecnológico Nacional de México, Instituto Tecnológico de Tijuana, Tijuana 22510, Mexico

\* Correspondence: vgarcia62@uabc.edu.mx; Tel.: +52-686-557-1622 (ext. 45309)

**Sup. Fig. S1** Protein expression of the targets XBP1s (**A**) and Nrf2 (**B**) on cellular lysates of parental and Variant B cells, under the concomitant treatment of LDL (25  $\mu$ g/mL) and Dox (500 nM).  $\beta$ -actin was used as a loading control.

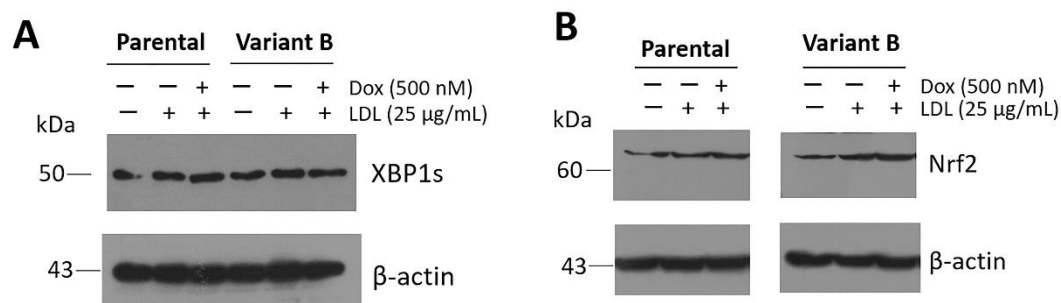

**Sup. Fig. S2.** Characterization of exosome internalization in variant B cells. **A)** Scheme corresponding to exosome isolation and staining. Purified exosomes (Exs) were stained with a CellMask probe generating Exs-CellMask. **B)** Variant B cells were treated with Exs-CellMask for 12 h and analyzed in a Cytoflex flow cytometer (20,000 events).

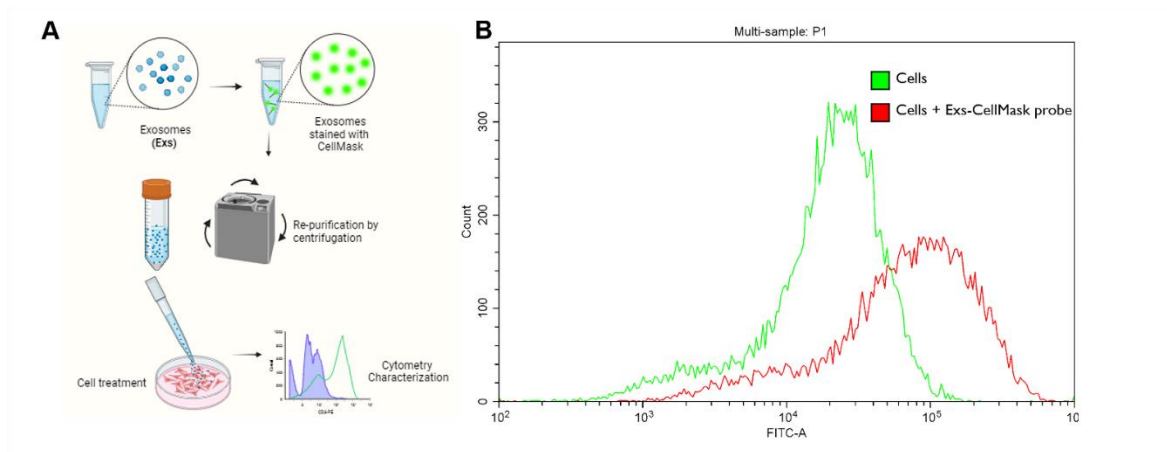

**Sup. Fig. S3.** Regulation of VEGF and p-eIF4E under the treatment with Exs-Ctrl and Exs-LDL (2.5% v/v) and concomitant incubation with Doxorubicin (Dox) (500 nM) for 36 h. ).  $\beta$ -actin was used as a loading control.

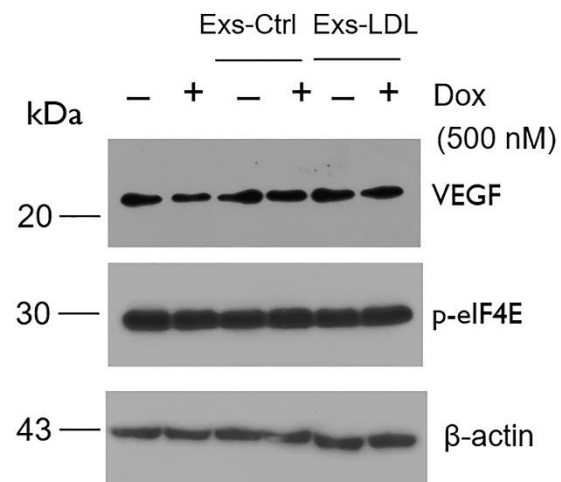

Supplement: s1 [file s1]
